# Supplementary material
Source: publisher figshare collection journal article supplement (https://acs.figshare.com/ndownloader/files/15347777)
Supplement: Supplementary file 1 [file 15347777]

## Supporting Information

# **Stretchable Polymer Gate Dielectric by Ultraviolet-Assisted Hafnium Oxide Doping at Low Temperature for High-Performance Indium Gallium Tin Oxide Transistors**

Jae Seok Hur,<sup>†</sup> Jeong Oh Kim,<sup>†</sup> Hyeon A Kim,<sup>‡</sup> and Jae Kyeong Jeong<sup>\*,†,‡</sup>

<sup>†</sup>Department of Information Display Engineering and <sup>‡</sup>Department of Electronic Engineering,  
Hanyang University, Seoul 133-791, South Korea

\*E-mail: [jkjeong1@hanyang.ac.kr](mailto:jkjeong1@hanyang.ac.kr).

## 1. FTIR spectra of the PVP-*co*-PMMA-based dielectric films.

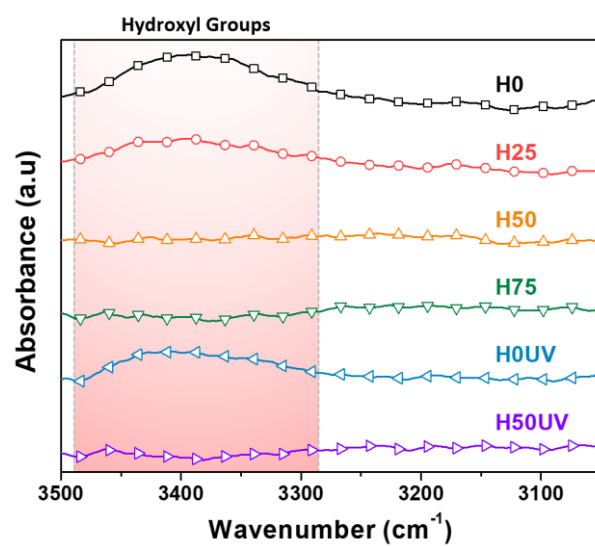

**Figure S1.** FTIR spectra of the PVP-*co*-PMMA-based dielectric films with different inorganic volumetric ratios and UV treatment.

## 2. Insulating and dielectric characteristics of the $\text{HfO}_x$ dielectric film.

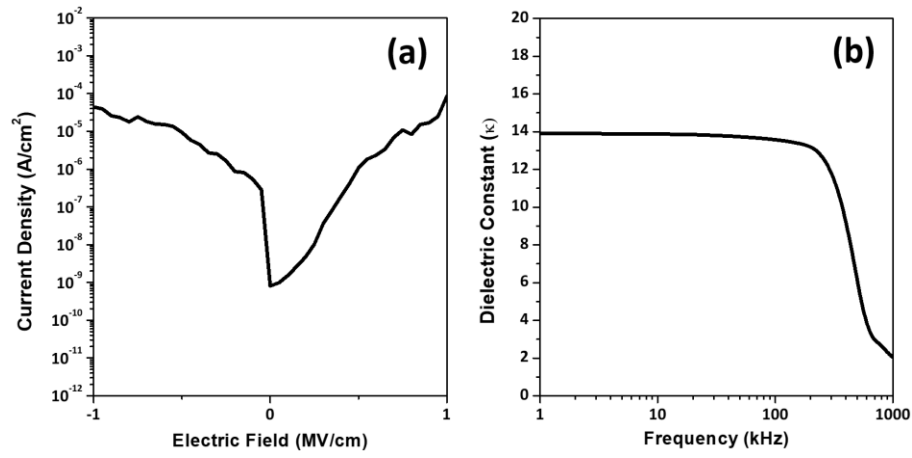

**Figure S2.** (a) Gate leakage current density ( $J_g$ ) versus applied electric field ( $E$ ) and (b) dielectric constant versus frequency characteristics of the capacitor with  $\text{HfO}_x$  dielectric film. Because the annealing was performed at a low temperature of  $150^\circ\text{C}$ , this capacitor suffered from huge leakage current density.

### 3. Transfer characteristics of the IGTO TFTs with a plot of $V_{GS}$ versus $I_{DS}^{1/2}$ .

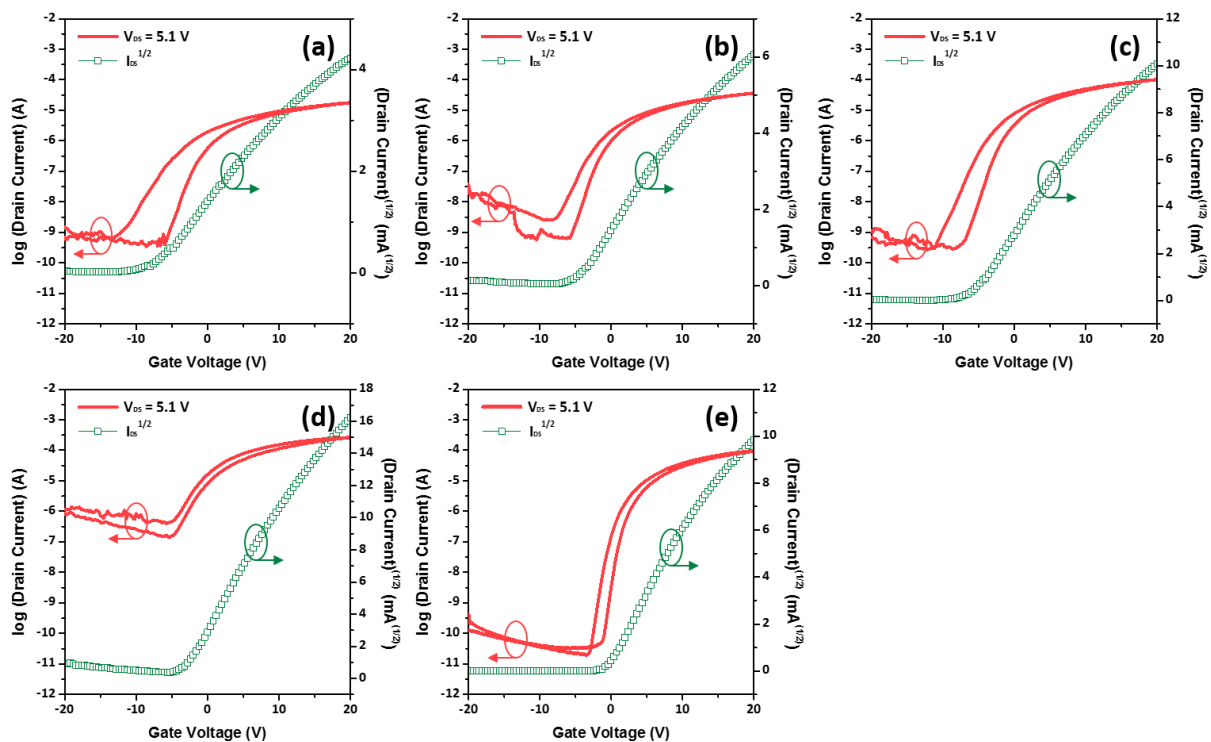

**Figure S3.** Transfer characteristics of the IGTO TFTs with PVP-*co*-PMMA-based gate insulators of (a) H0, (b) H25, (c) H50, (d) H75, and (e) H50UV when  $V_{DS}$  is 5.1 V. Also the plot of  $V_{GS}$  versus  $I_{DS}^{1/2}$  value was shown in each transfer curve.

#### 4. Mobility extraction of the IGTO TFTs.

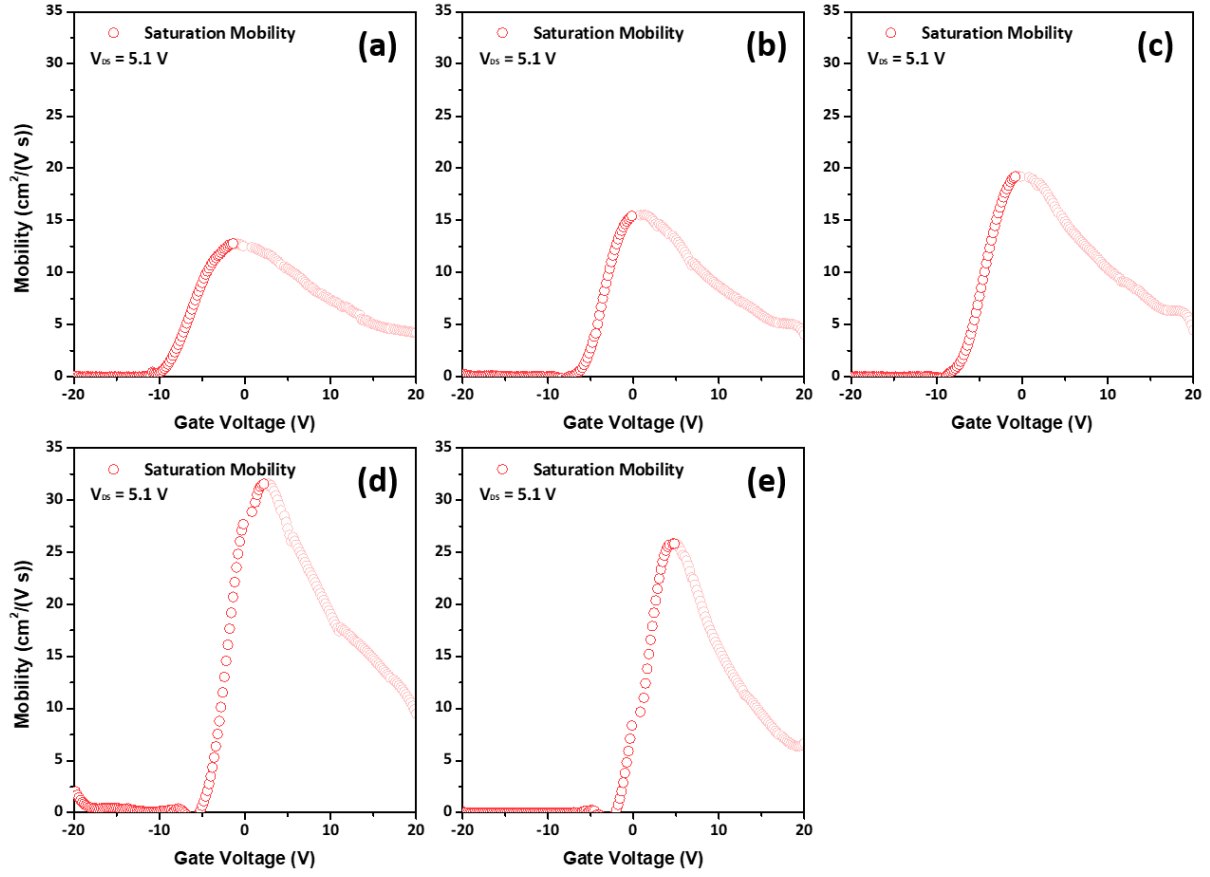

**Figures S4.** Saturation mobility calculation from the measured drain current values ( $V_{DS} = 5.1 \text{ V}$ , forward direction) of the IGTO TFTs with PVP-co-PMMA-based gate insulators of (a) H0, (b) H25, (c) H50, (d) H75, and (e) H50UV. Deep red symbols indicate the mobility values at the saturation region.

## **5. Fabrication process of PDMS film and Al<sub>2</sub>O<sub>3</sub> dielectric film.**

The polydimethylsiloxane (PDMS) films were prepared using sylgard 184 silicone elastomer kit (Dow Corning Co.) by mixing base and curing agent at volume ratio of 10: 1. The mixture was vigorously stirred for 10 min and then placed in a vacuum desiccator for 3 h until the bubbles were completely removed. Then, the mixture was spin-cast onto the glass substrates at 500 rpm for 30 s, followed by pre-baking on a hot plate for 10 min at 150 °C for thermal curing. The thickness of the PDMS films were approximately 200  $\mu\text{m}$ . Before the dielectric film deposition on the PDMS films, UV light was shined onto the PDMS films for 1 h to modify the surface properties from hydrophobic to hydrophilic to achieve the improved adhesion between the PDMS film and dielectric film.

The Al<sub>2</sub>O<sub>3</sub> dielectric films were prepared by traveling wave type thermal ALD (CN1 Co., Ltd.) from using trimethylaluminium (TMA) as precursor. Ozone (O<sub>3</sub>) and nitrogen (N<sub>2</sub>) gases were employed as an oxidant and carrier gas, respectively. The substrate temperature was kept at 150 °C to satisfy the maximum process temperature of our work. No additional annealing process was done after deposition by the ALD system.
